# Supplementary material
Source: HighWire-hosted journal article supplement (https://jpet.aspetjournals.org/highwire/filestream/150788/field_highwire_adjunct_files/0/898SuppFigures.pdf)

**Title: The Andrographolide analogue 3A.1 synergizes with Taxane derivatives in aggressive metastatic prostate cancers by upregulation of Heat Shock proteins and downregulation of MAT2A-mediated cell migration and invasion**

Taraswi Mitra Ghosh<sup>1</sup>, Teeratas Kansom<sup>1,2</sup>, Suman Mazumder<sup>1,4</sup>, Joshua Davis<sup>1</sup>, Ahmed S. Alnaim<sup>1</sup>, Shanese L. Jasper<sup>1</sup>, Chu Zhang<sup>1</sup>, Aedan Bird<sup>1</sup>, Praneet Opanasopit<sup>2</sup>, Amit K Mitra<sup>1,3,4</sup> and Robert D. Arnold<sup>1,3,\*</sup>

<sup>1</sup>Department of Drug Discovery & Development, Harrison School of Pharmacy, Auburn University, Auburn, AL, USA.

<sup>2</sup>Department of Pharmaceutical Technology, Faculty of Pharmacy, Silpakorn University, Thailand.

<sup>3</sup>University of Alabama at Birmingham O'Neal Comprehensive Cancer Center, Birmingham, AL, USA.

<sup>4</sup>Center for Pharmacogenomics and Single-Cell Omics Initiative, Auburn University, Auburn, AL, USA

**\*Corresponding Author:**

**Robert D. Arnold, Ph.D.**

Professor, Department of Drug Discovery & Development,  
Auburn University, Harrison School of Pharmacy

Pharmaceutical Research Building

720 South Donahue Drive, Rm. 257

Auburn, AL 36849

Phone: (334) 844-8434

Email: [rda0007@auburn.edu](mailto:rda0007@auburn.edu)

**Supplementary Figure 1.*****In vitro* Docetaxel (DTX), Cabazitaxel (CBZ) and andrographolide analogue (3A.1) response in human aggressive prostate cell lines**

A) Bar graphs represent the dose reduction (Reduce Dose-RD, calculated by Dose Reduction Index) for all cell lines treated with the 3A.1+DTX and 3A.1+ CBZ in combination treatment at  $IC_{75}$ .

B) Bar graphs represent the dose reduction (Reduce Dose-RD, calculated by Dose Reduction Index) for all cell lines treated with the 3A.1+DTX and 3A.1+ CBZ in combination treatment at  $IC_{90}$ .

C) Combination Index (CI) DTX, CBZ and 3A.1 observed at  $IC_{50}$ ,  $IC_{75}$  and  $IC_{90}$ . The CI value  $<1$ ,  $=1$ , and  $>1$  refer to synergistic, additive and antagonistic effect of the drugs treated in combination, respectively.

To evaluate the pharmacological interactions, percent (%) of cells were affected (fraction affected - Fa) by DTX or CBZ and 3A.1 treatment were analyzed by CompuSyn® version 1.0 software.

Combination index (CI) value was calculated according to Chou's method

([https://doi.org/10.1016/0065-2571\(84\)90007-4](https://doi.org/10.1016/0065-2571(84)90007-4)). (\* =  $p \leq 0.05$ ).

A.

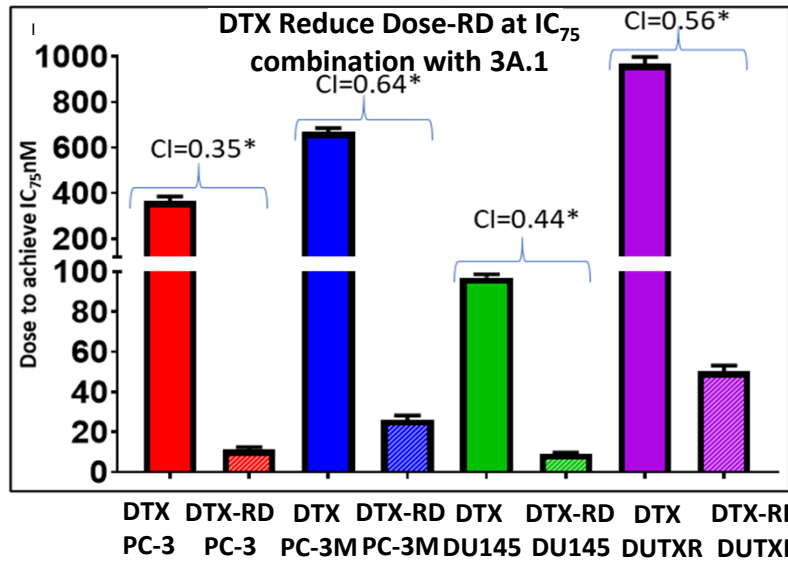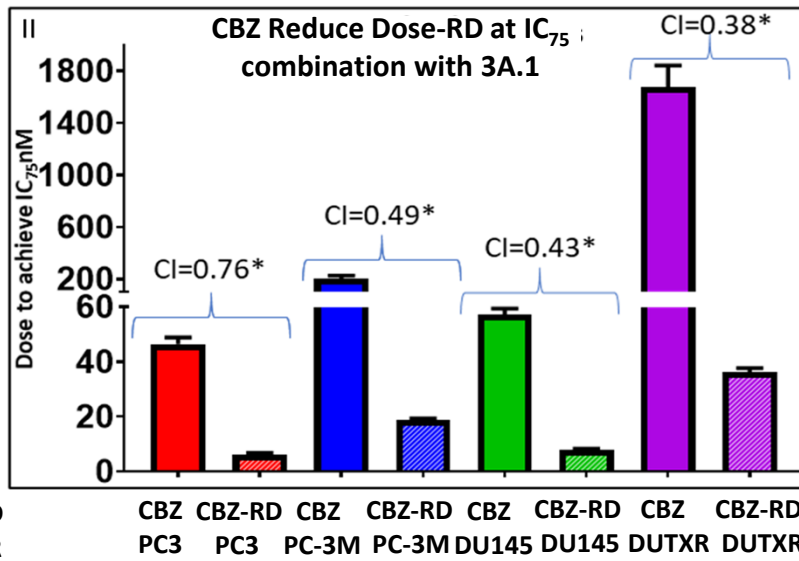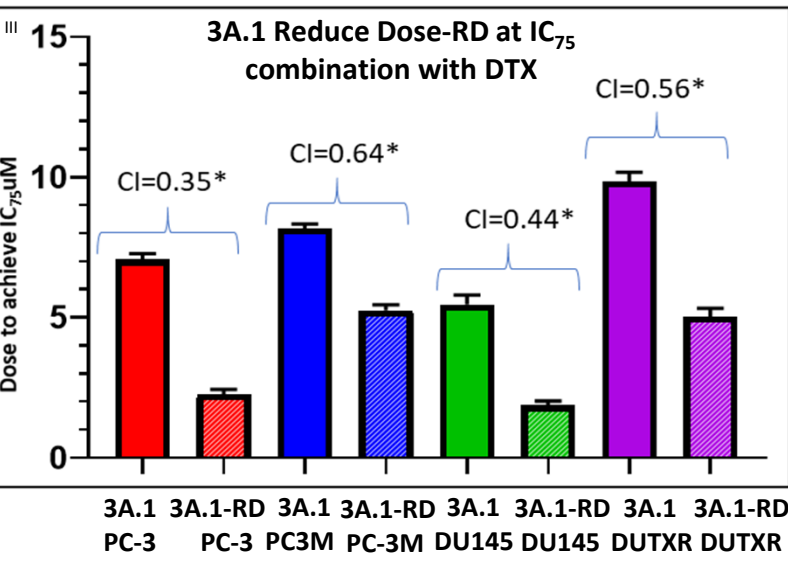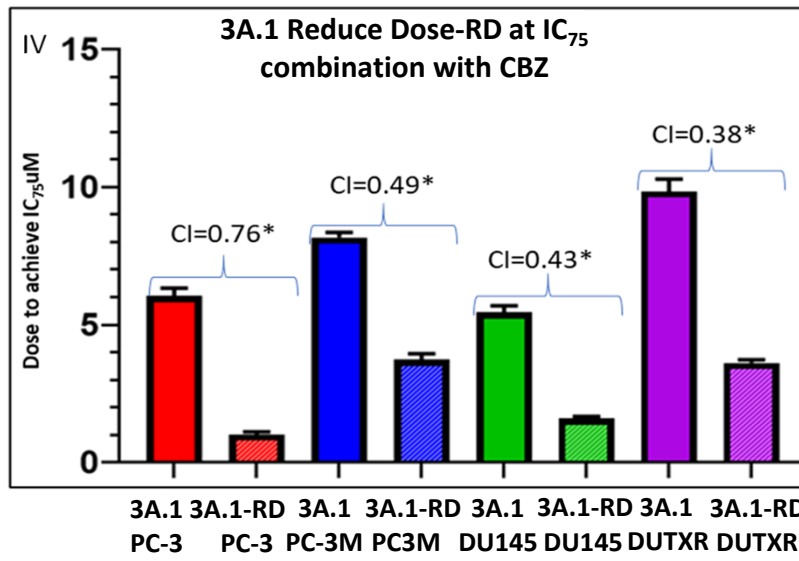

B.

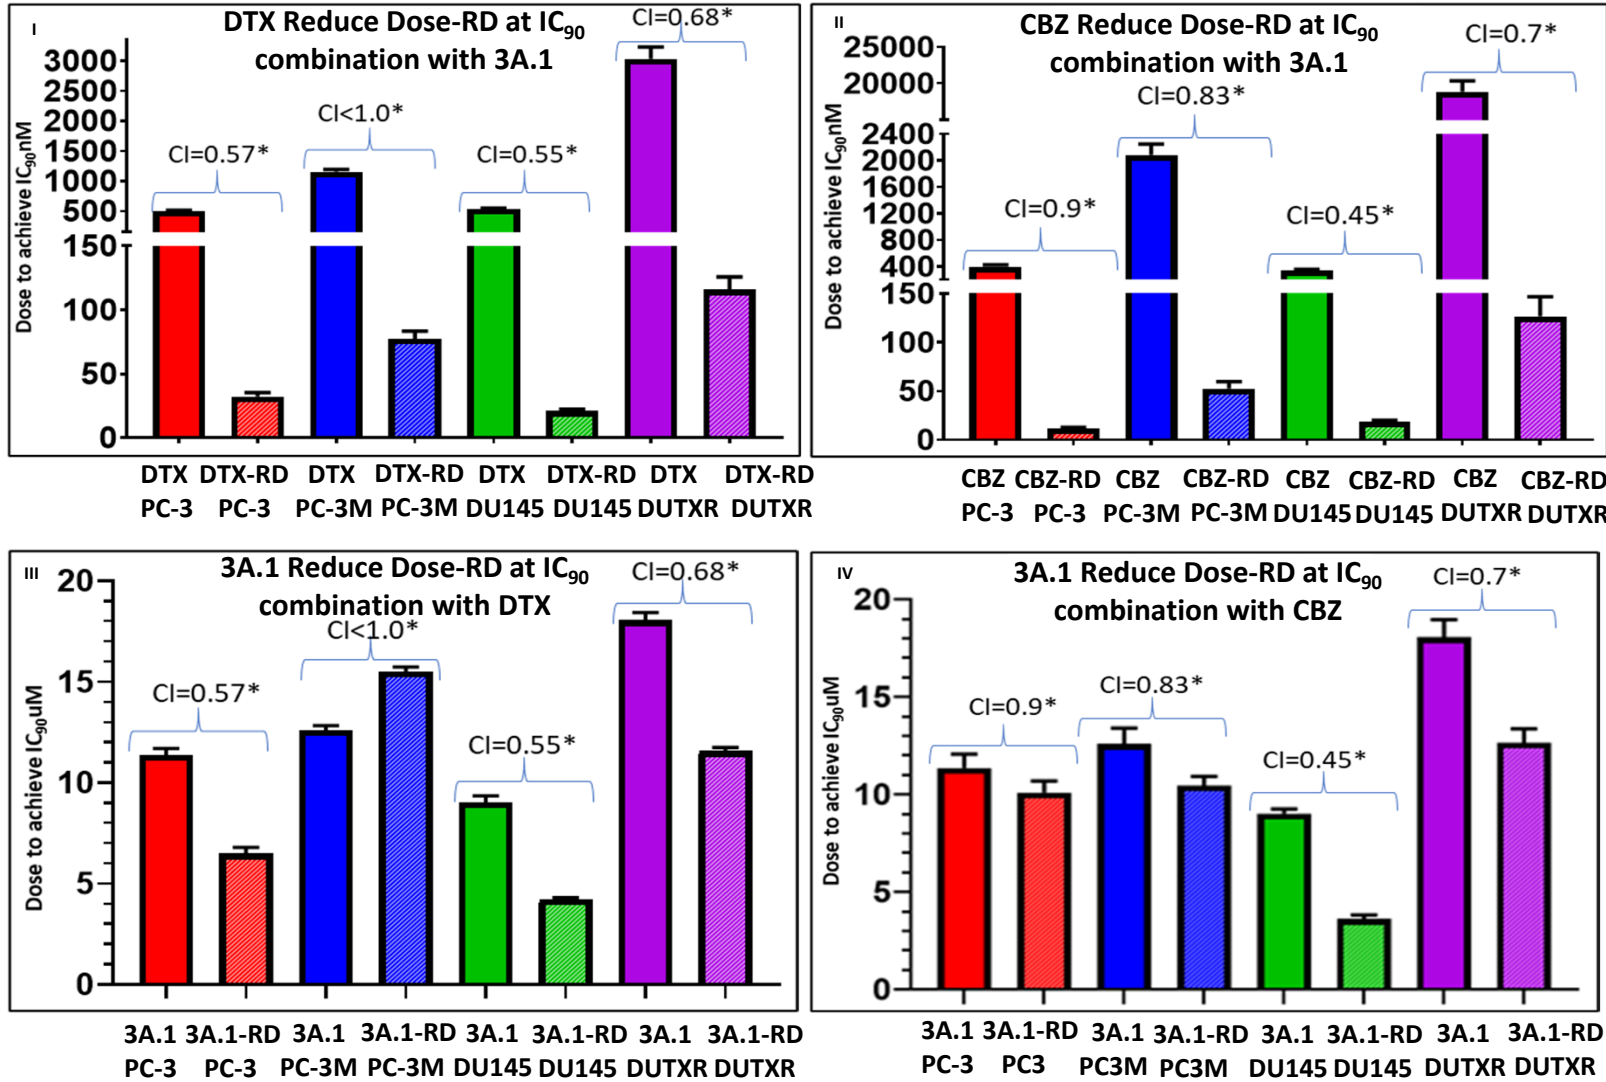

C.

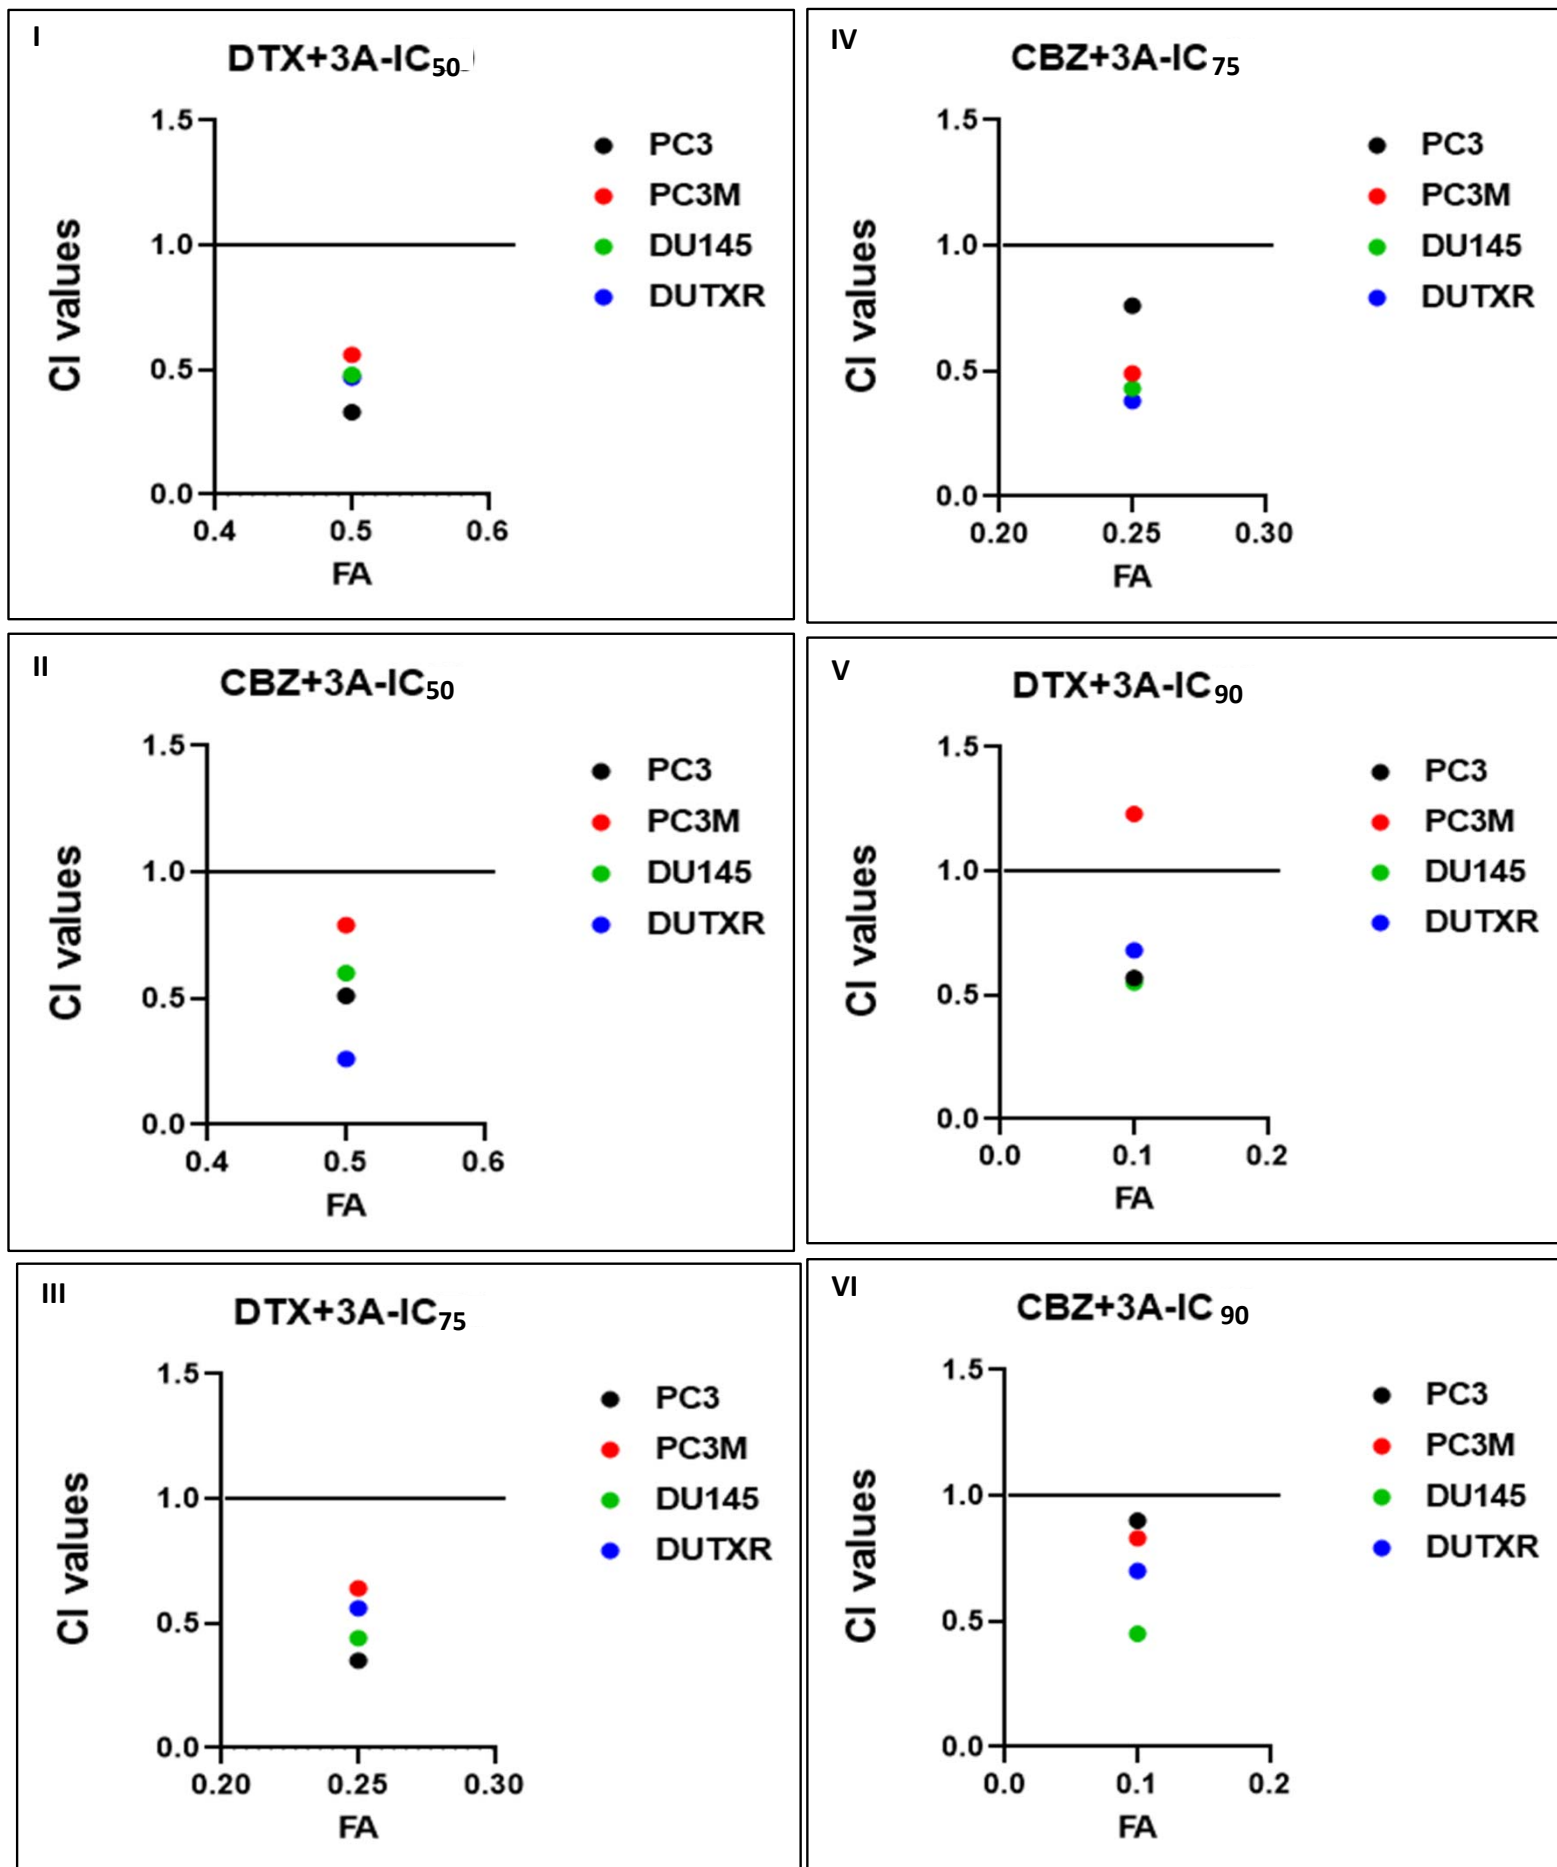

## Supplementary Figure 2. Differential gene expression profile

- A. Graphical summary of IPA analysis predicted various canonical pathways, causal network, upstream and downstream regulators (genes) for various treatment regimens 3A.1, DTX, DTX+3A.1, CBZ, CBZ+3A.1 in all cell lines ( $p < 0.05$ )
- B. Venn diagrams illustrating unique and common DEGs (based on RNAseq gene expression analysis) among 3A.1, DTX, DTX+3A.1, CBZ, CBZ+3A.1 treatments in DU145 vs DUTXR cell lines ( $p < 0.05$ ).

## Supplementary Figure 2.

A.

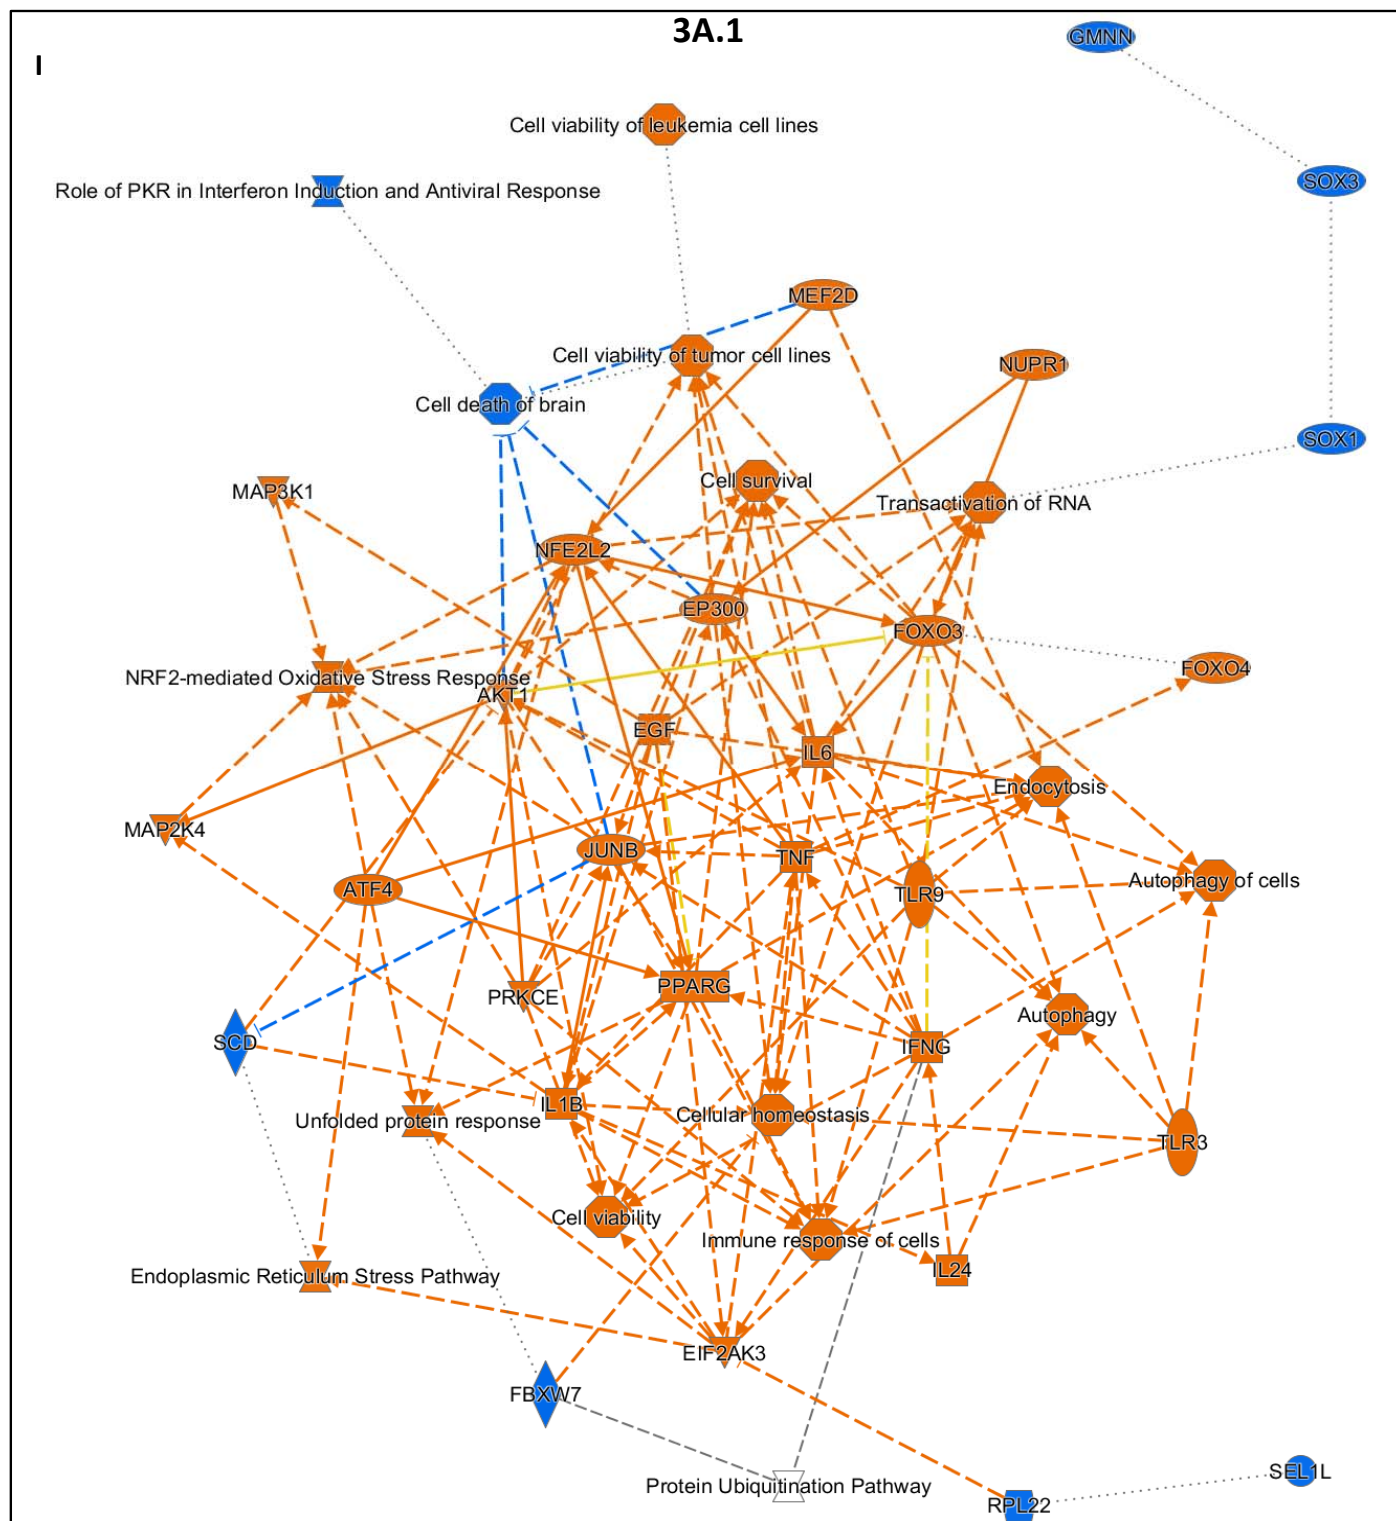



A.

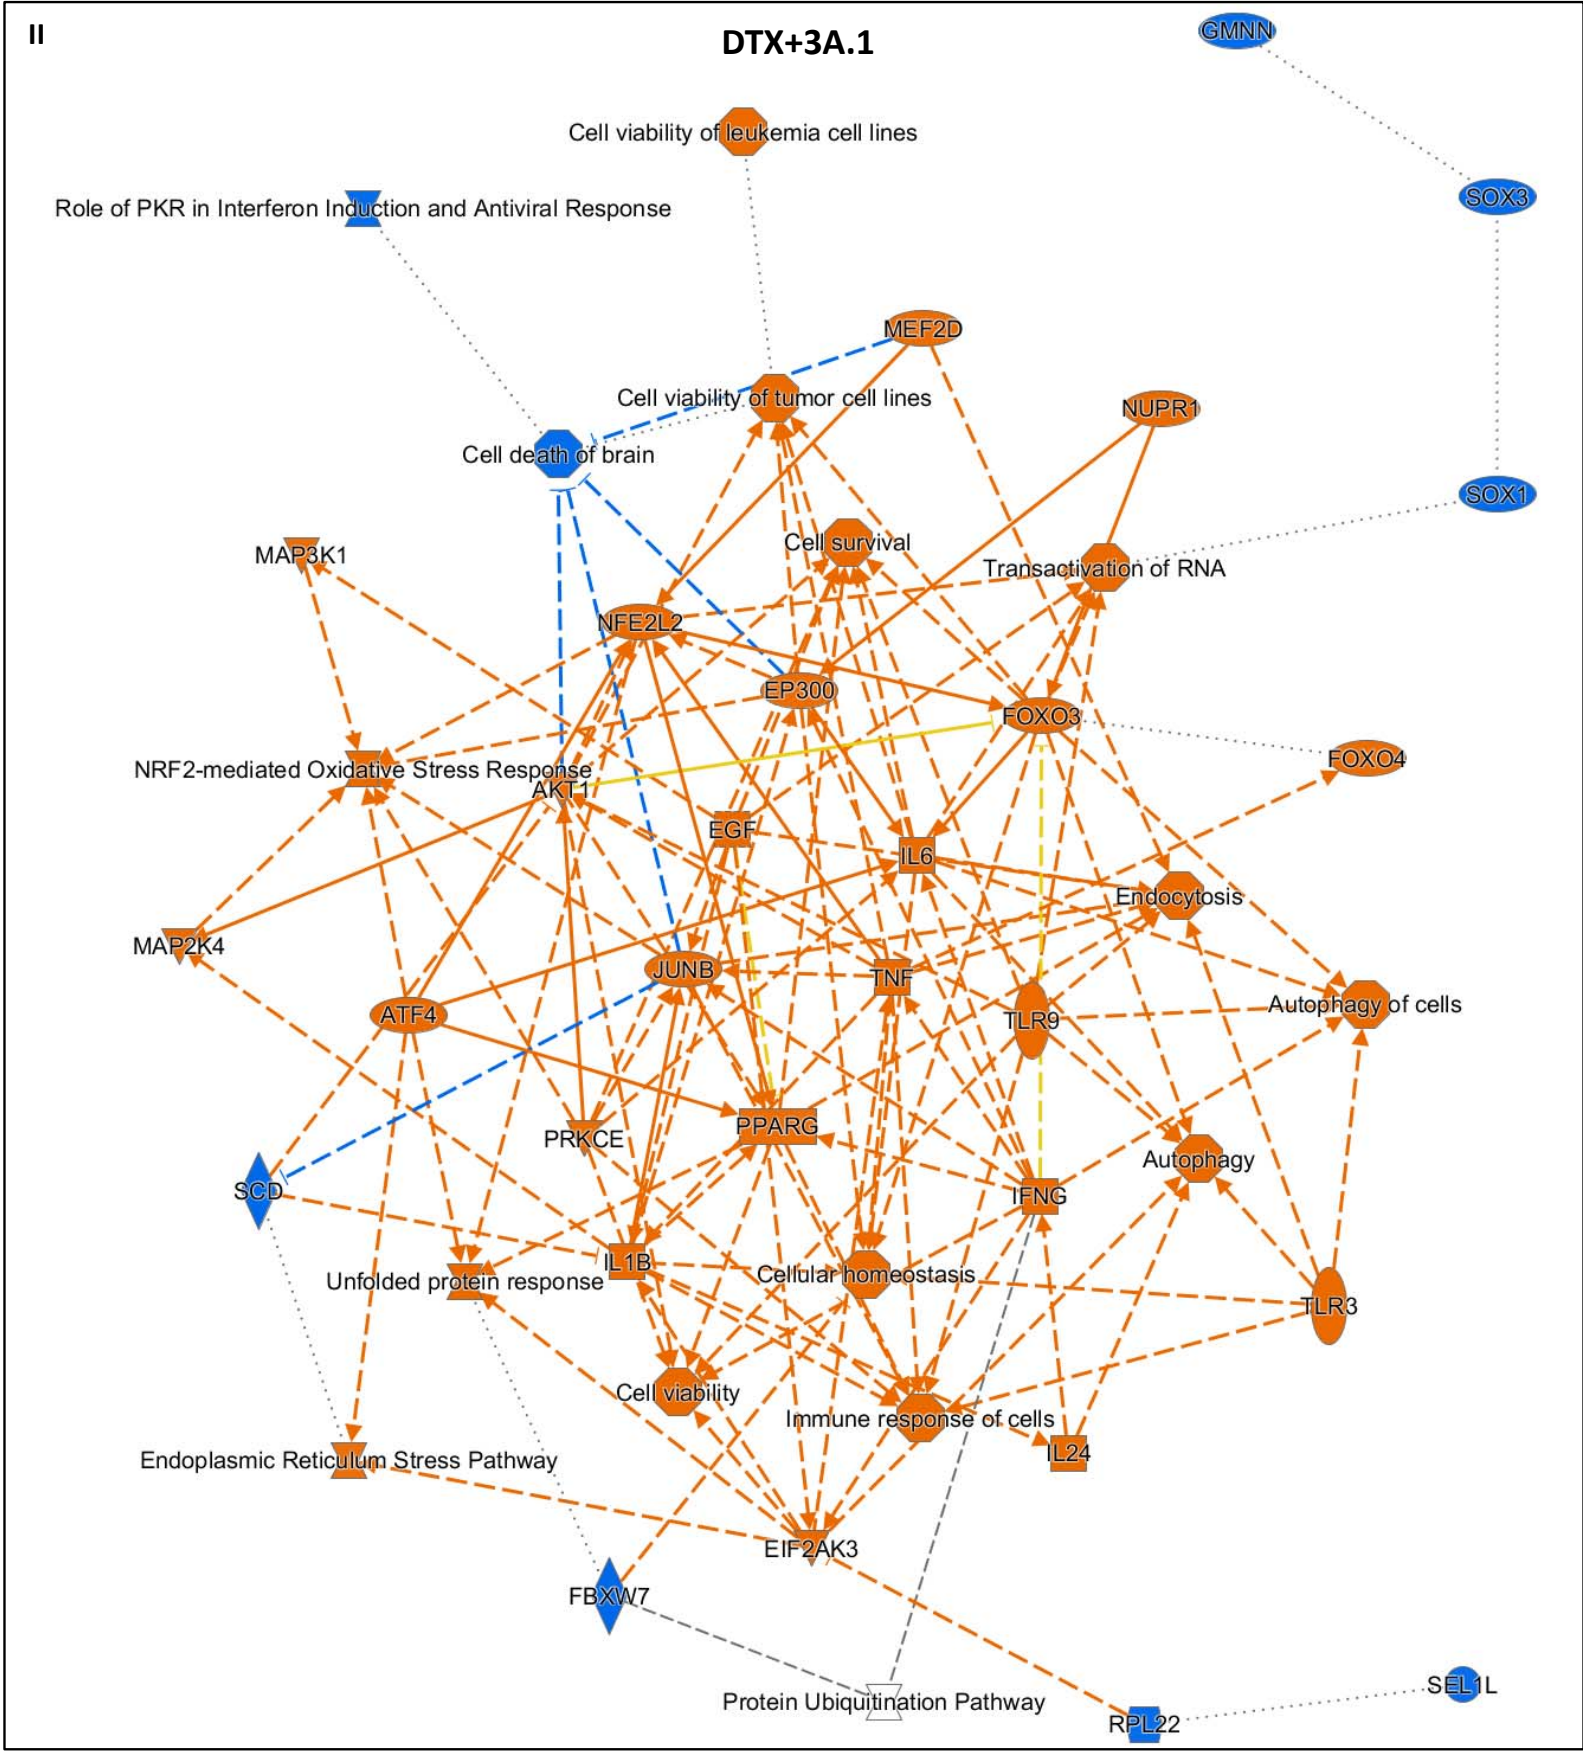

A.

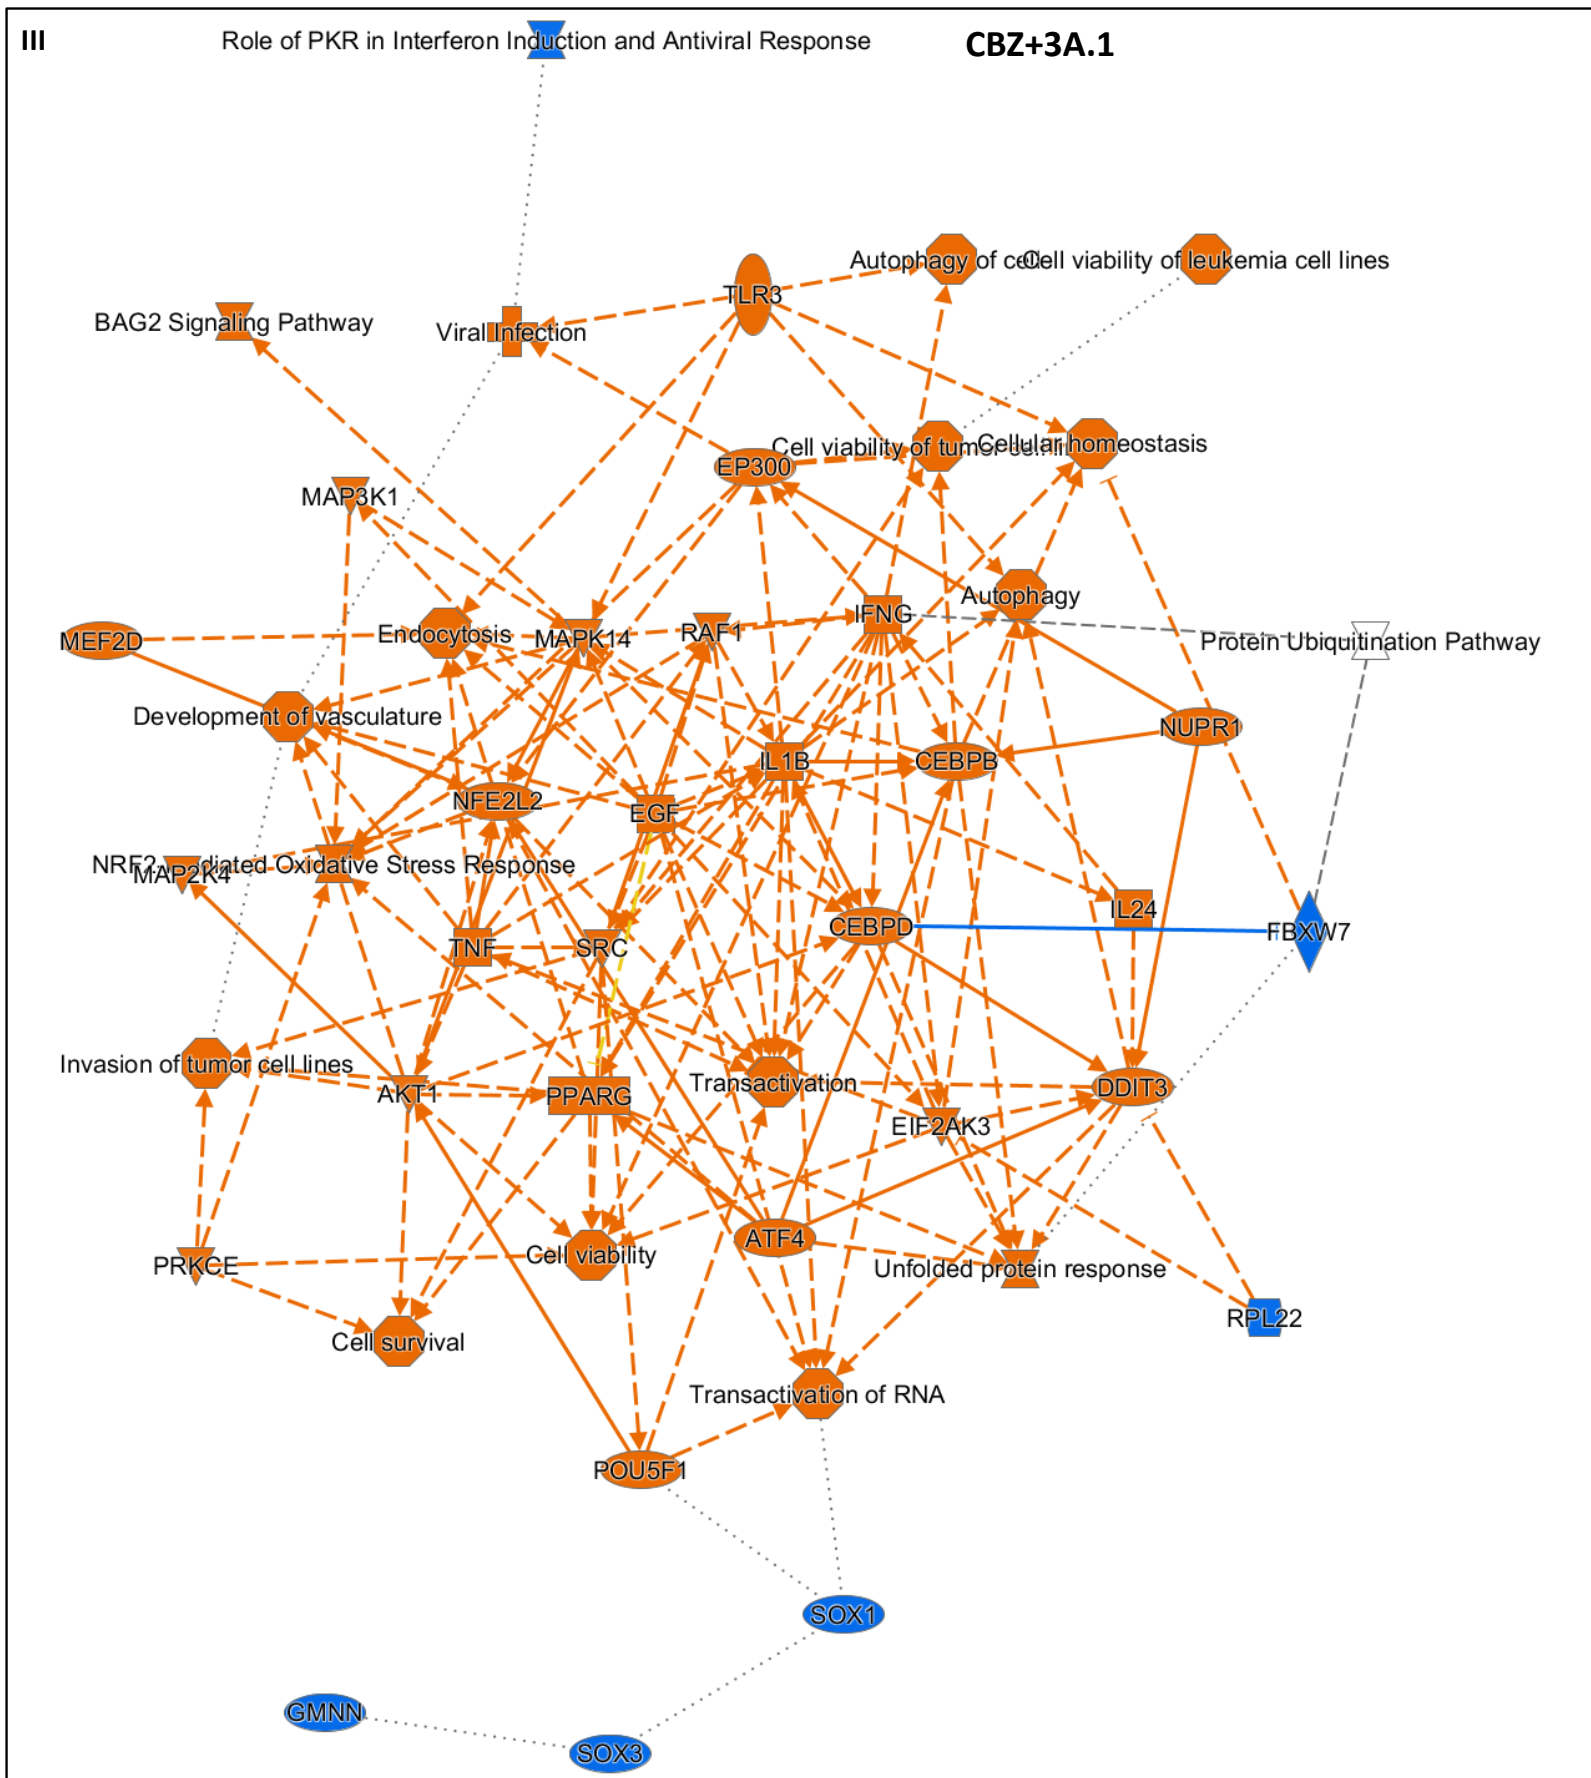



B.

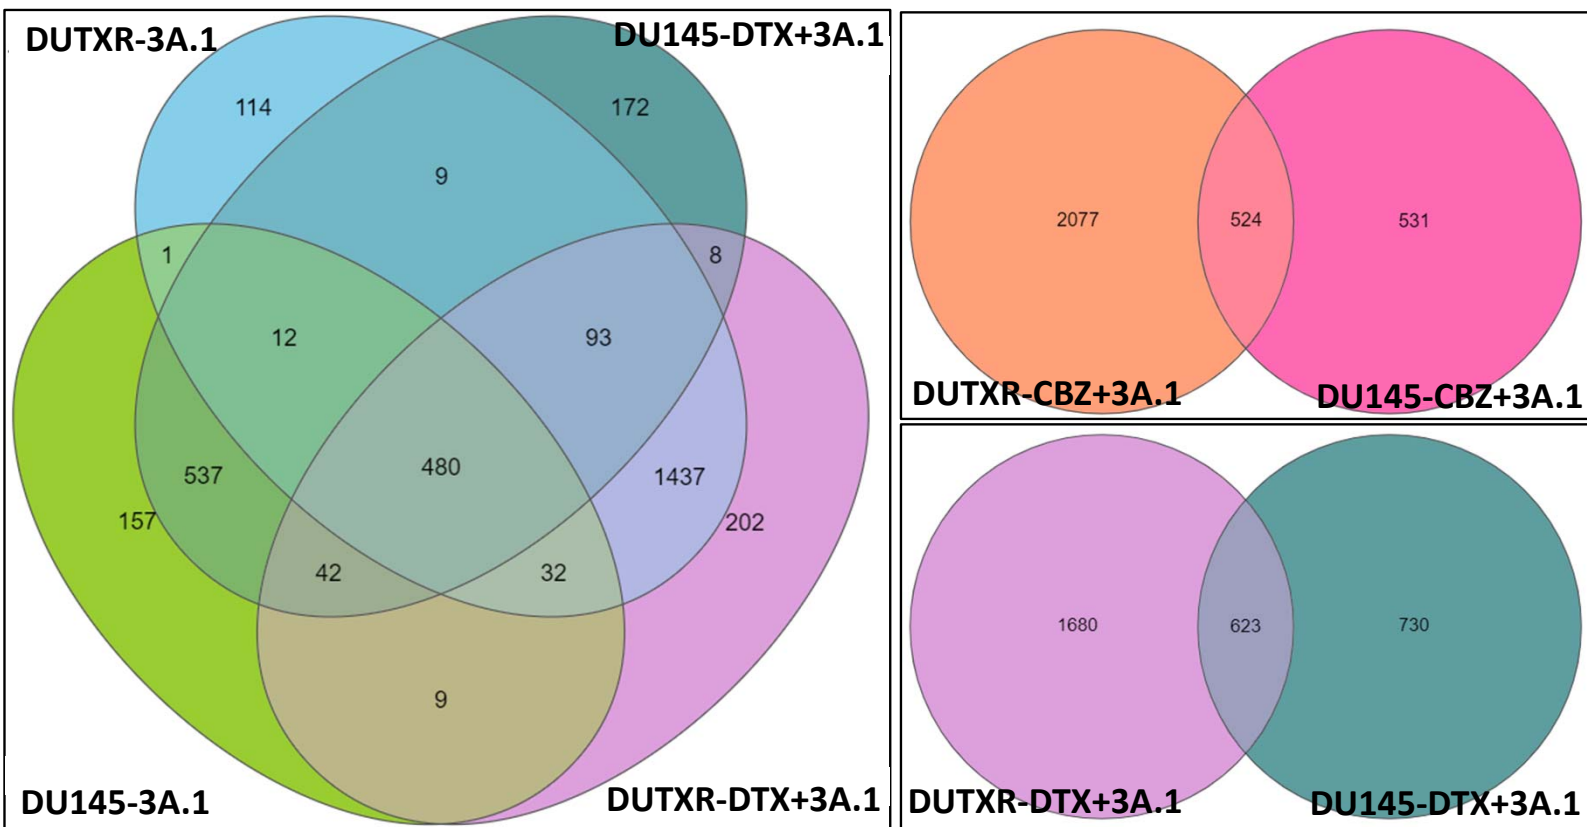

### Supplementary Figure 3. Functional analysis of the top DEG (MAT2A) using *in silico* approach (TCGA data)

Genes highly co-expressed ( $r > 0.7$ ) with MAT2A (TRA2B and SF1) are associated with patient survival PRAD patients.

### Supplementary Figure 3.

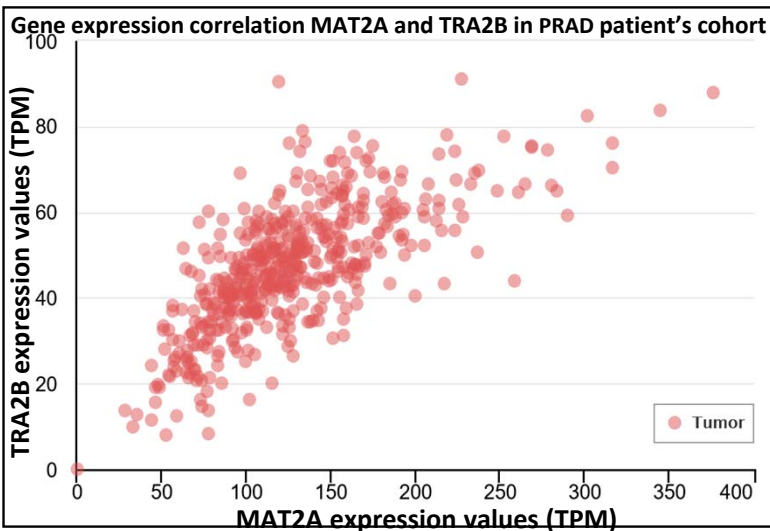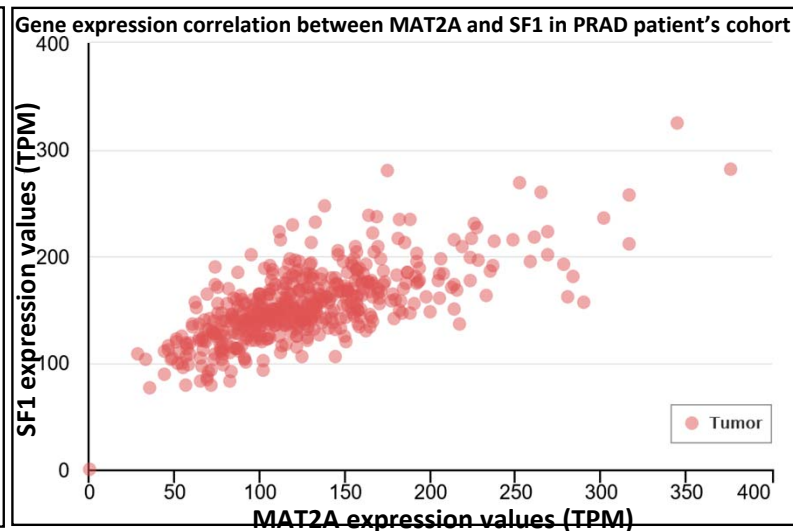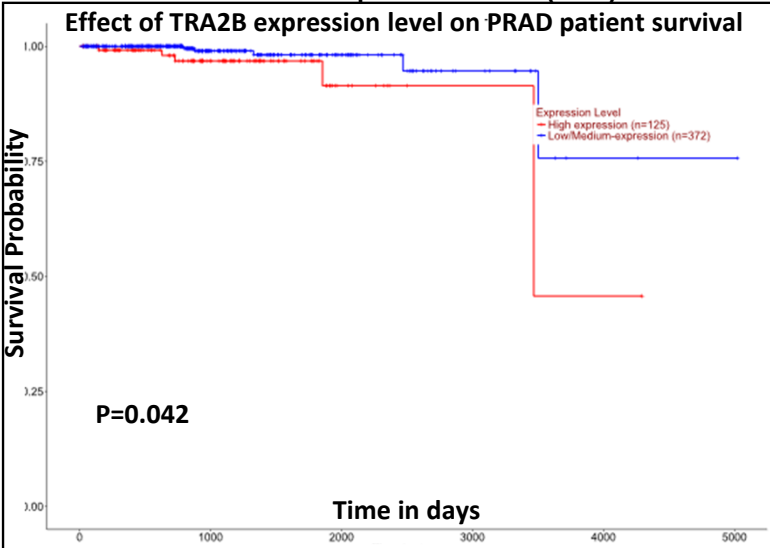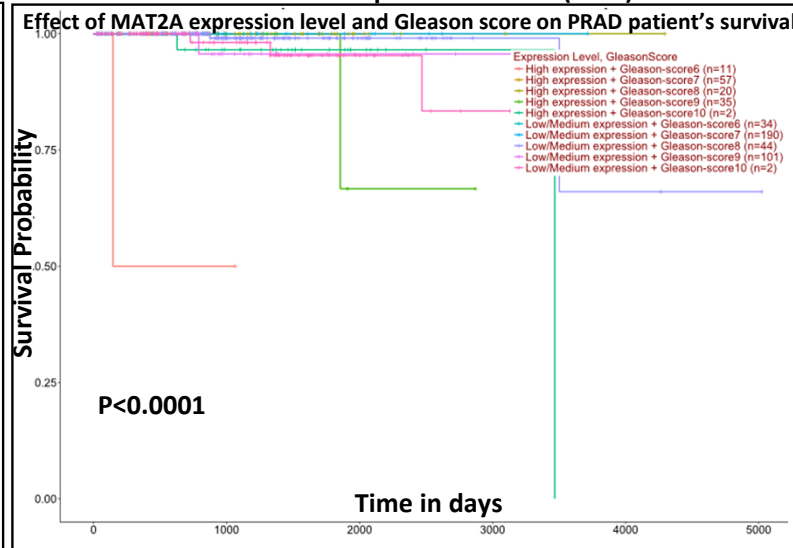



Supplementary Figure 4.

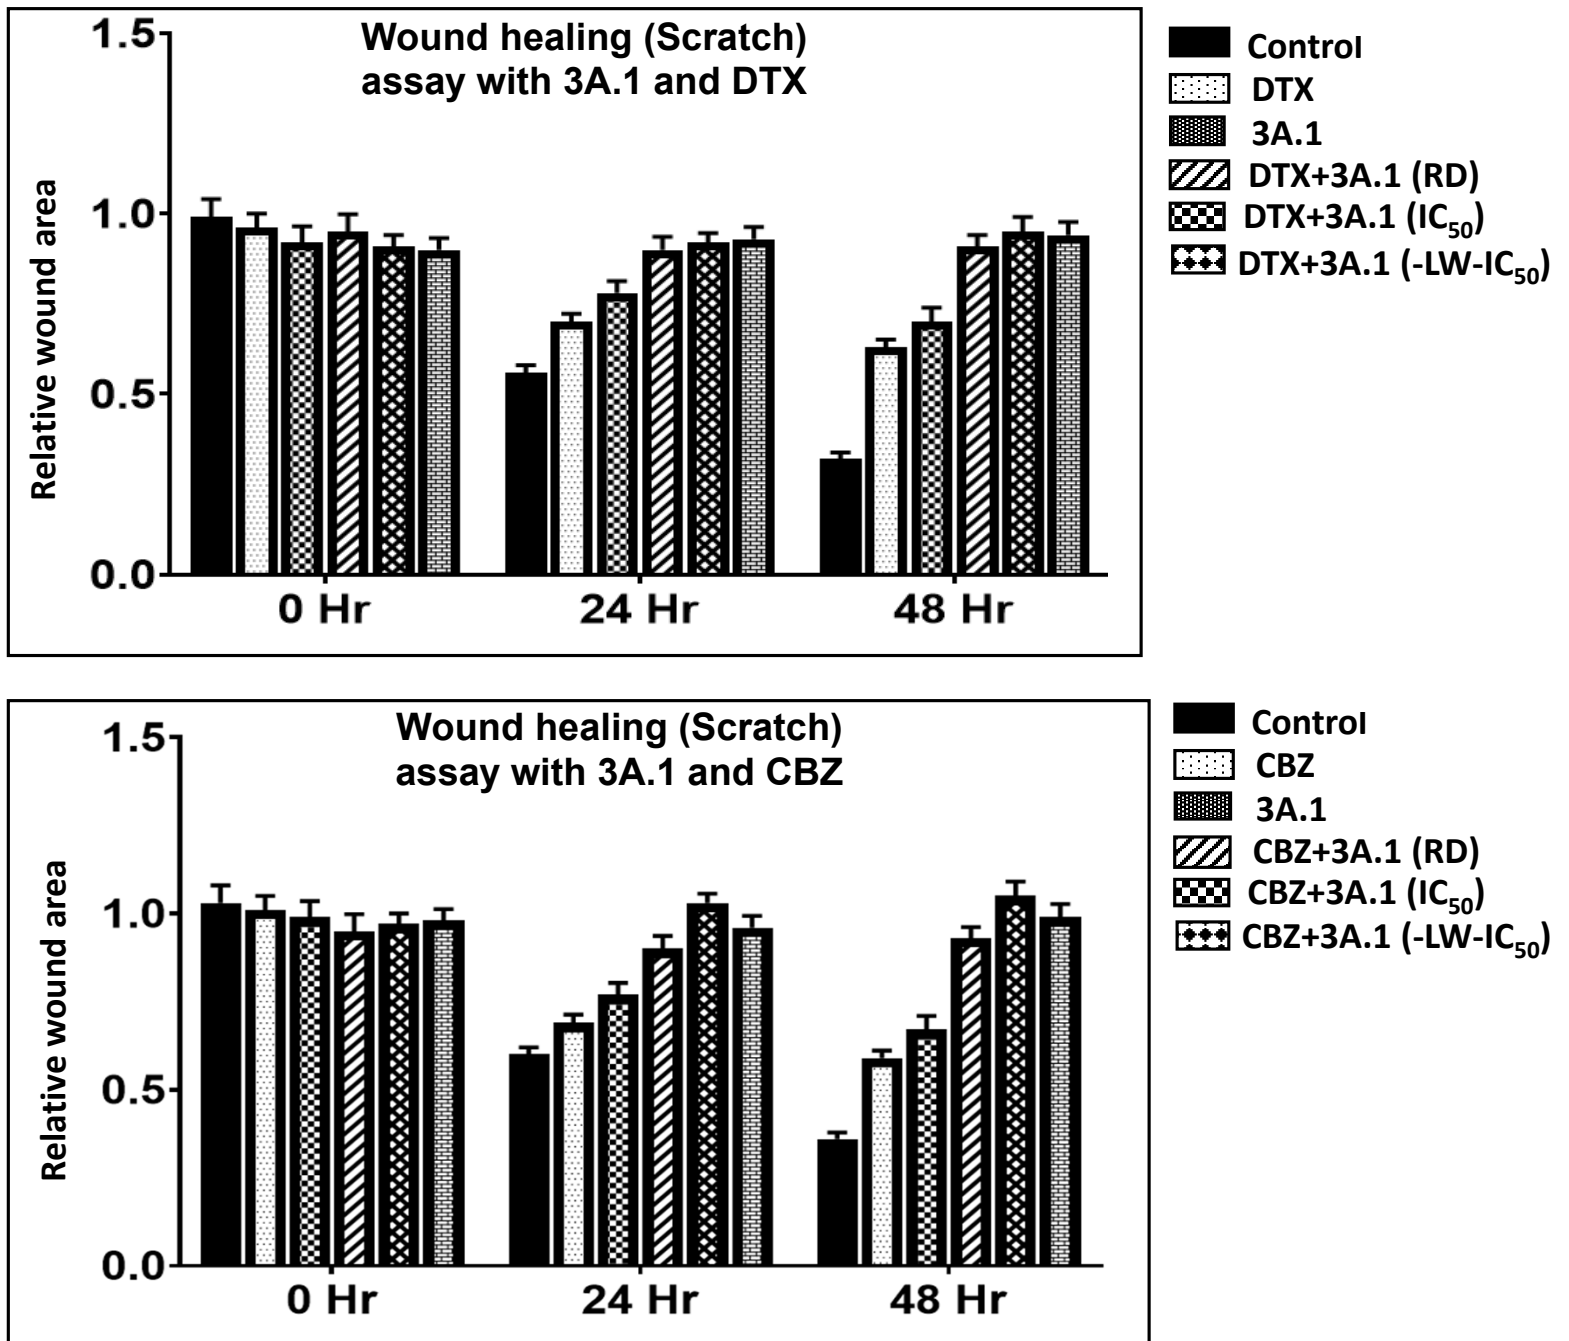

Supplement: 898SuppFigures.pdf [file 898SuppFigures.pdf]
